# Supplementary material
Source: PubMed Central journal article supplement (PMC4325157)
Supplement: AEM.03268-14_zam999116044so1.pdf [file AEM.03268-14_zam999116044so1.pdf]

## Supplemental Material

### Genetic engineering activates biosynthesis of aromatic fumaric acid amides in the human pathogen *Aspergillus fumigatus*

Daniel Kalb,<sup>a</sup> Thorsten Heinekamp,<sup>b</sup> Gerald Lackner,<sup>a</sup> Daniel H. Scharf,<sup>b</sup> Hans-Martin Dahse,<sup>c</sup> Axel A. Brakhage,<sup>b</sup> Dirk Hoffmeister<sup>a,#</sup>

**Running title:** Aromatic fumaric acid amides in *Aspergillus fumigatus*

Department of Pharmaceutical Microbiology at the Leibniz Institute for Natural Product Research and Infection Biology (HKI), Friedrich-Schiller-Universität, Jena, Germany<sup>a</sup>; Department of Molecular and Applied Microbiology, Leibniz Institute for Natural Product Research and Infection Biology (HKI), Jena, Germany<sup>b</sup>; Department of Infection Biology, Leibniz Institute for Natural Product Research and Infection Biology, (HKI), Jena, Germany<sup>c</sup>

<sup>#</sup>Corresponding author. E-mail address: dirk.hoffmeister@hki-jena.de.

**A**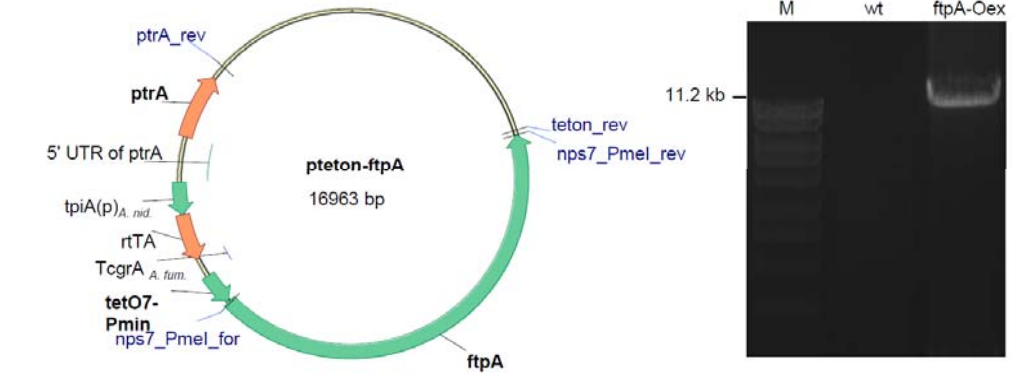**B**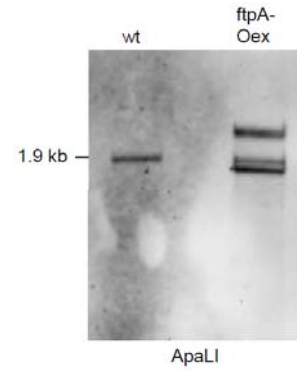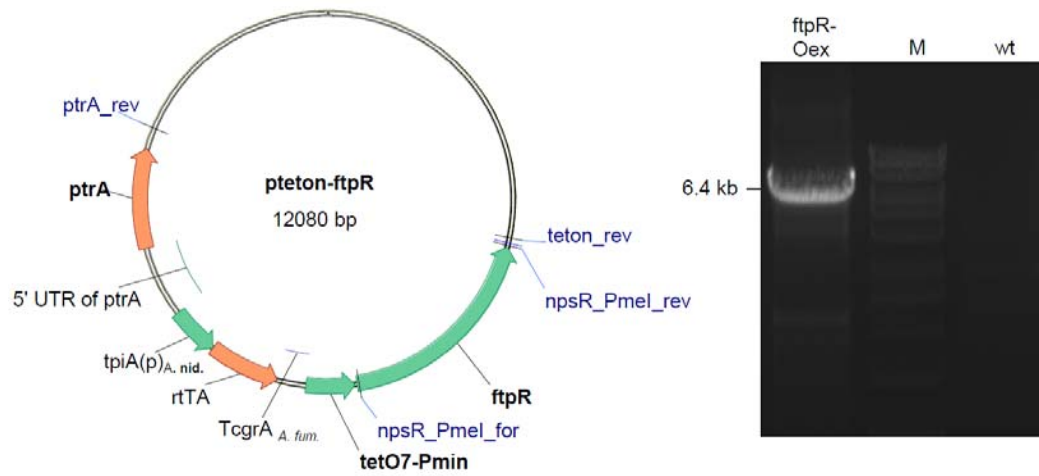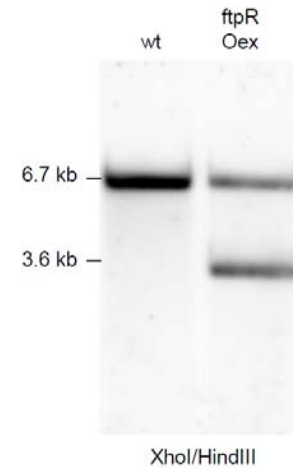

**C**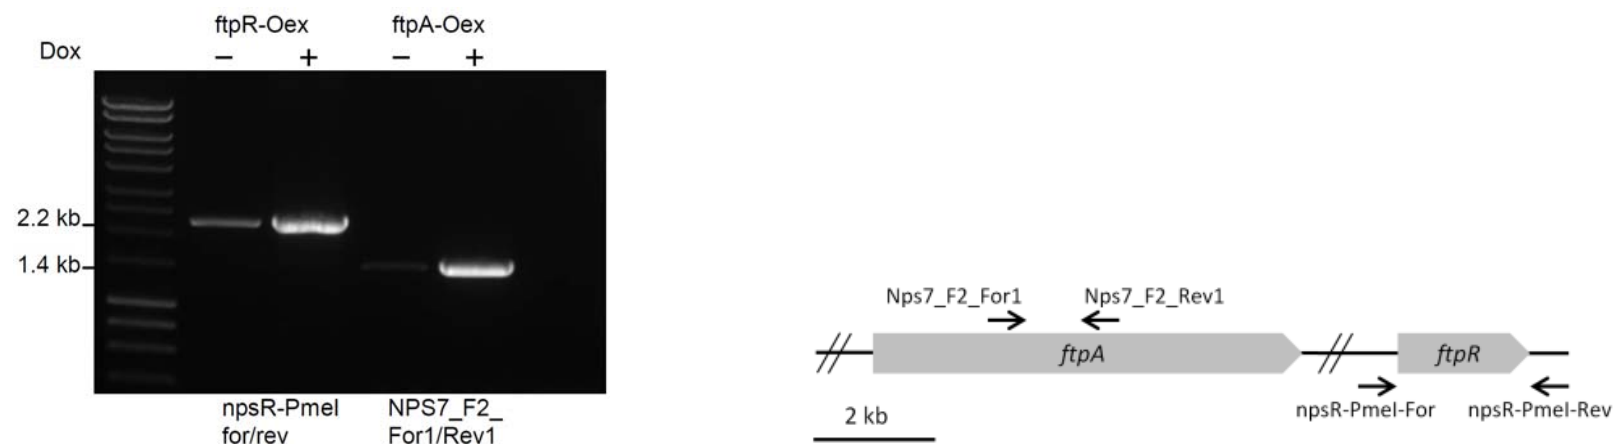

**Figure S1:** Genetic manipulation of *A. fumigatus*.

A) PCR-based verification that the teton-*ftpA* and teton-*ftpR* overexpression constructs (pteton-*ftpA* and pteton-*ftpR*) were successfully integrated into the *A. fumigatus* genome. Integration of the *ftpA*-Oex and *ftpR*-Oex constructs was verified using primers ptrA-rev and teton-rev (Table S1). The expected 11.2 kb and 6.4 kb fragments, respectively, were amplified. PCR parameters were: initial denaturation step at 98°C for 30 s, 30 cycles of denaturation (10 s at 98°C), primer annealing (10 s at 62 °C) and elongation (3 min at 72 °C). For PCR analysis of the mutant strains, the Phusion Flash High-Fidelity PCR Master Mix (Thermo Scientific, Germany) was used according to the manufacturer's instructions. M = DNA size marker.

B) Southern blot verification of teton-*ftpA* and teton-*ftpR* integration. Genomic DNA of the wild type and the *ftpA*-Oex strain was digested with *Apa*LI restriction endonuclease, yielding a 1.9 kb signal both in the wild type and in *ftpA*-Oex. The latter showed two additional signals caused by ectopic integrations of the plasmid. The probe was amplified from genomic *A. fumigatus* DNA using primers nps7\_PmeI\_for and nps7\_int\_rev. For analysis of the *ftpR*-Oex strain, DNA was digested with *Xho*I and *Hind*III, yielding a 6.7 kb band both in the wild type and in the the *ftpR*-Oex mutant. The latter showed an additional signal with a size of 3.6 kb caused by ectopic integration of the plasmid. The probe was amplified from genomic *A. fumigatus* DNA using primers ftpR\_int\_for and npsR\_PmeI\_rev.

C) Verification of doxycycline-mediated inducibility of *ftpA* and *ftpR* by RT-PCR and agarose gel electrophoresis. The *A. fumigatus* strains *ftpR*-Oex and *ftpA*-Oex were cultivated for 16 h in *Aspergillus* minimal medium. Overexpression of *ftpR* and *ftpA* was then induced by addition of doxycycline (10 µg/mL final concentration), followed by incubation for another 2 h. Non-induced cultures served as control. Mycelium was harvested by filtration and stored in liquid nitrogen. RNA isolation was performed with the SV Total RNA Isolation System (Promega), subsequent first strand cDNA synthesis was carried out using the Thermo

Scientific First Strand cDNA Synthesis Kit. PCR was performed using the Phusion Flash High-Fidelity PCR Master Mix (Thermo Scientific) and 0.25 µl cDNA of the respective strains as template in a 30 µl reaction, and primer pairs NpsR\_PmeI\_for/NpsR\_PmeI\_rev and Nps7\_F2\_For1/ Nps7\_F2\_Rev1, respectively (Table S1). The positions of the PCR primers for *ftpR* and partial *ftpA* amplification are indicated in the graph on the right hand side. Thermal cycling conditions were: 30 s initial denaturation at 98°C, 30 cycles (10 s denaturation, 10 s annealing at 62°C, 40 s elongation at 72°C). Agarose gel electrophoresis showed the presence of the expected PCR products (2.2 and 1.4 kb, respectively). The weak DNA bands in the non-induced (doxycycline negative) samples indicate basal transcription due to an incomplete suppression under non-inducing conditions. Dox = doxycycline.

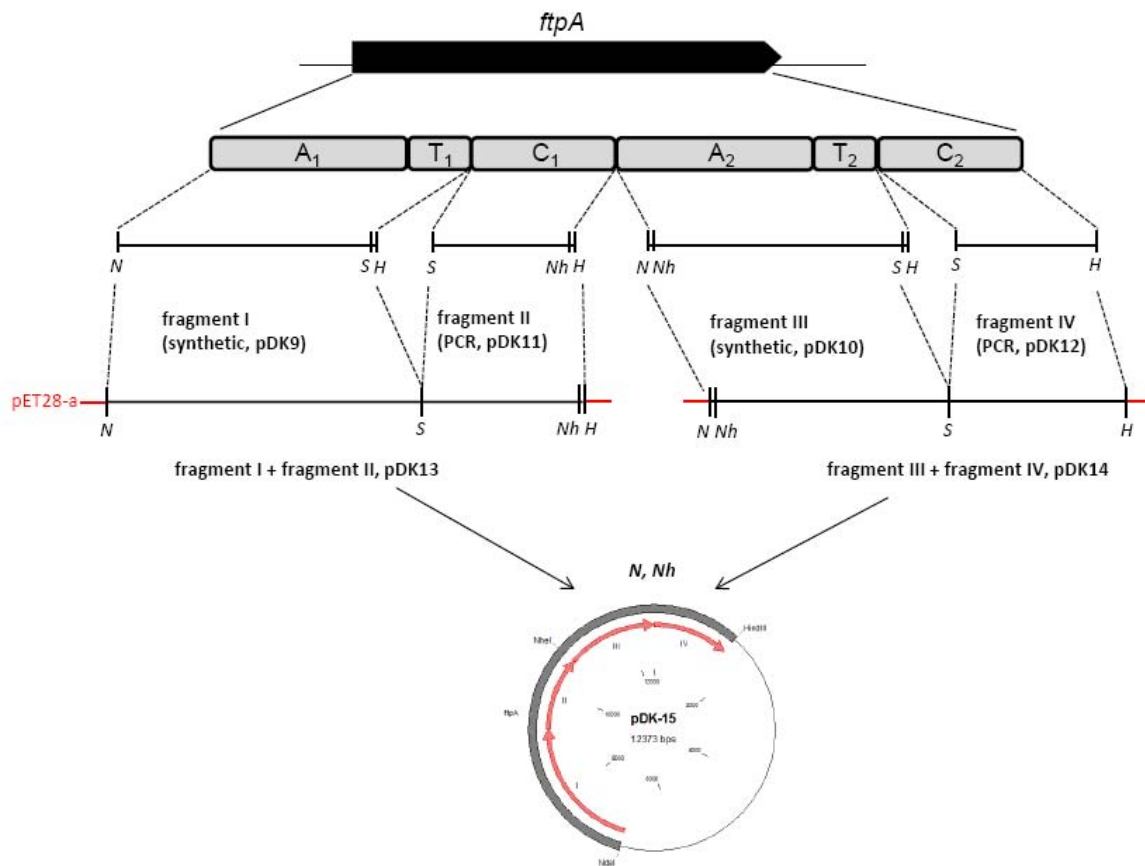

**Figure S2:** Reconstitution of the full length *ftpA* reading frame to create the pET28a-based gene expression construct pDK15. Fragment I (fragment III) was synthesized as codon-optimized gene and inserted via the NdeI and HindIII sites into pET28a to create plasmid pDK9 (pDK10). Fragment II (fragment IV) were created by PCR and cloned into pBluescript to yield plasmid pDK11 (pDK12). To assemble fragments I and II (III and IV), the latter was cloned between the SacII and HindIII sites of pDK9 (DK10), to yield plasmid pDK13 (pDK14). The insert of pDK13 was released by restriction with NdeI and NheI, and inserted into pDK14 via the same sites, to yield expression plasmid pDK15 that includes the reconstituted full-length *ftpA* gene. Restriction sites are abbreviated as follows: H: HindIII, N: NdeI, Nh: NheI, S: SacII.

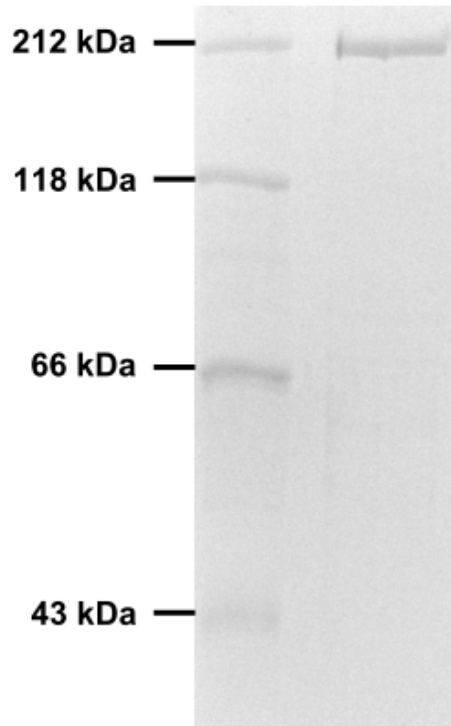

**Figure S3:** SDS-polyacrylamide gel of *Aspergillus fumigatus* full length FtpA after purification on Ni<sup>2+</sup>-NTA.

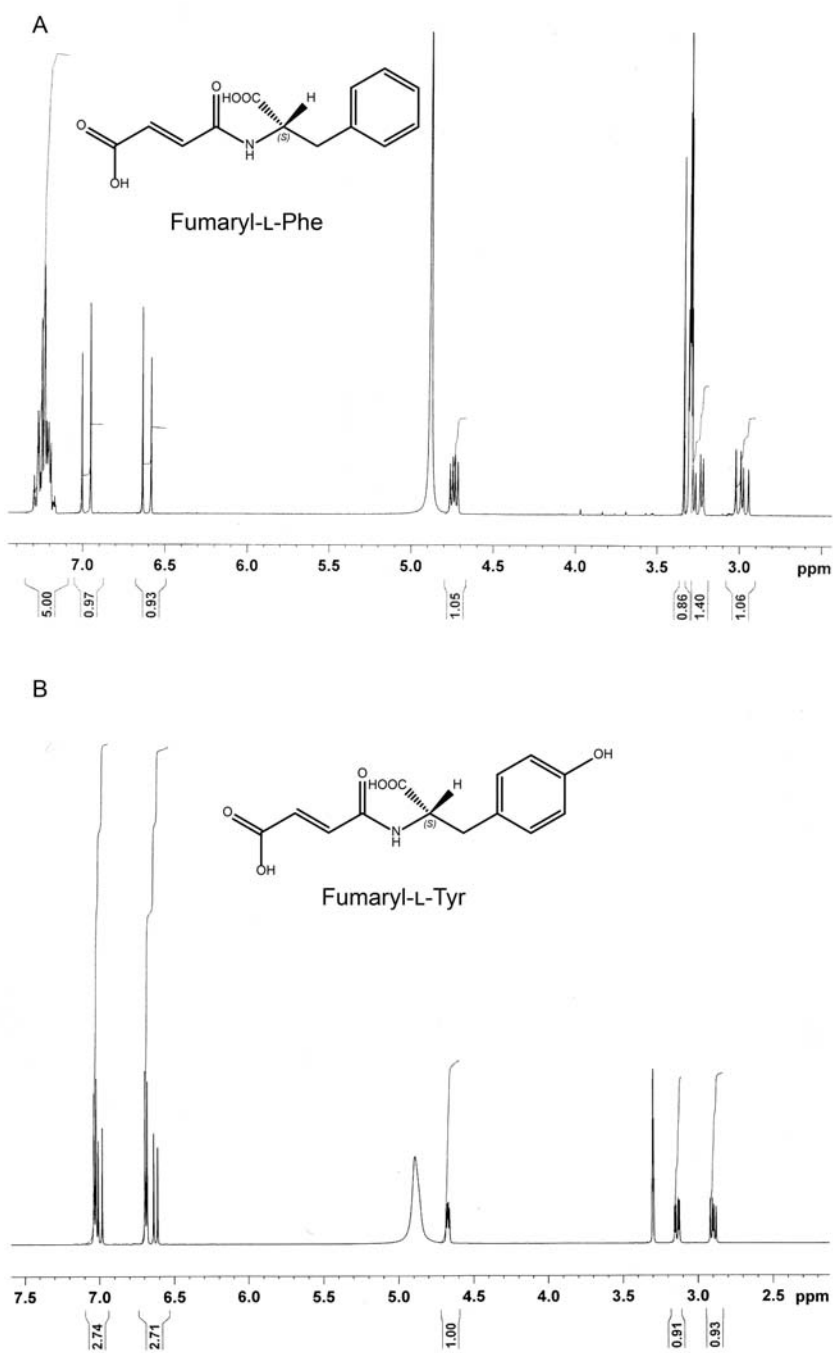

**Figure S4:**  $^1\text{H}$  NMR spectra ( $\text{CD}_3\text{OD}$ , 600 MHz) of synthetic fumaryl-L-phenylalanine (panel A) and fumaryl-L-tyrosine (panel B) standards.

**Table S1:** Oligonucleotide primers used during this study.

| Oligonucleotide | Sequence (5' - 3')                          | Restriction site <sup>a</sup> |
|-----------------|---------------------------------------------|-------------------------------|
| NPS7_A1_f1      | <b>GCTAGC</b> ACCCTGCAGCGTGTTACCGC          | <i>NheI</i>                   |
| NPS7_A1_r1      | <b>GCGGCCG</b> CTTAGCTACCAATACTGCTACGTTC    | <i>NotI</i>                   |
| NPS7_F2_For1    | GAGACGCTGTTCCAAGTTGC                        | -                             |
| NPS7_F2_Rev1    | GCTACA <b>AAGCTT</b> AGAGGCGGCCATTCTCTG     | <i>HindIII</i>                |
| NPS7_F4_For1    | CTGGGCAGTATGCTTCGTC                         | -                             |
| NPS7_F4_Rev2    | GCTACA <b>AAGCTT</b> GTAGACCCCCAGCTCCCCAACC | <i>HindIII</i>                |
| NpsR_PmeI_for   | <b>GTTTAAAC</b> ATGATCTGCATGGATTCAGC        | <i>PmeI</i>                   |
| NpsR_PmeI_rev   | <b>GTTTAAAC</b> GTTTCTATCTGAGCAAAC          | <i>PmeI</i>                   |
| Nps7_PmeI_for   | <b>GTTTAAAC</b> ATGGCCCCATACATCGGTAC        | <i>PmeI</i>                   |
| Nps7_PmeI_rev   | <b>GTTTAAAC</b> CTAGACCCCCAGCTCCCCAAC       | <i>PmeI</i>                   |
| ptrA_rev        | GCTTGATGGCCTAGATGGCCTC                      |                               |
| teton_rev       | GTTTACGTCGCCGTCCAGC                         |                               |
| nps7_int_rev    | CCTCAATCAGGGAATGAGCC                        |                               |
| ftpR_int_for    | GCCAGTTTCGACCACACAAC                        |                               |

<sup>a</sup>refers to artificial restriction sites (bold) introduced by PCR primers.



**Table S2:** Compounds used in substrate pools and/or individually during the ATP-[<sup>32</sup>P]pyrophosphate radiolabel exchange assay to characterize the substrate preference of FtpA adenylation domains. Amino acids were L-configured.

| <b>Substrate pool #</b> | <b>Substrates</b>                                                                                          |
|-------------------------|------------------------------------------------------------------------------------------------------------|
| I                       | Gly, Ala, Val, Leu, Ile                                                                                    |
| II                      | Cys, Met, Ser, Thr, Pro                                                                                    |
| III                     | His, Phe, Tyr, Trp                                                                                         |
| IV                      | Asp, Asn, Glu, Gln                                                                                         |
| V                       | Lys, Arg, Orn, oxalic acid                                                                                 |
| VI                      | pyruvic acid, α-ketoglutaric acid, phenylpyruvic acid, 4-hydroxyphenylpyruvic acid, indolyl-3-pyruvic acid |
| VII                     | malonic acid, succinic acid, fumaric acid, maleic acid, malic acid, tartaric acid, citric acid             |
| VIII                    | benzoic acid, 4-hydroxybenzoic acid, salicylic acid, 2,3-dihydroxybenzoic acid.                            |

**Table S3:** Adenylation activity of the FtpA A<sub>1</sub> and A<sub>2</sub> domains as a function of pH and temperature, determined by the ATP-[<sup>32</sup>P]pyrophosphate radioisotope exchange assay. Optimal turnover was set to 100%.

| pH  | A <sub>1</sub> [%] | A <sub>2</sub> [%] |
|-----|--------------------|--------------------|
| 5.5 | < 20               | < 20               |
| 6.0 | < 20               | < 20               |
| 6.5 | < 20               | 56.1               |
| 7.0 | 71.1               | 86.8               |
| 7.5 | 100.0              | 100.0              |
| 8.0 | 72.1               | 77.0               |
| 8.5 | 64.5               | 67.4               |
| 9.0 | 58.2               | 51.2               |

| temperature [°C] | A1 [%] | A2 [%] |
|------------------|--------|--------|
| 5                | 33.6   | 55.1   |
| 10               | 62.7   | 62.6   |
| 15               | 66.7   | 76.2   |
| 20               | 72.9   | 80.7   |
| 25               | 76.6   | 84.8   |
| 30               | 81.1   | 88.3   |
| 37               | 100.0  | 100.0  |
| 45               | 22.1   | 71.5   |
